# Supplementary material for: Antioxidant Responses Induced by PFAS Exposure in Freshwater Fish in the Veneto Region
Source: Preprints.org preprint supplement (doi:10.20944/preprints202205.0154.v1), 2022-05-12
Supplement: Supplementary file 3 [file supplementary]

| PRIMER | Sequences 5’🡪3’ | Amplicon (bp) | Ta (°C) |
| --- | --- | --- | --- |
| 3_FW_SOD2_GOBY_RT | 5'- ACAAGATGTCTGCCGCCACA-3' | 162 | 60 |
| 3_REV_SOD2_GOBY_RT | 5'- GCTCCCACACGTCAATGCCC-3' | 60 |
| go_GPX4b_b_fw | 5’- TTGGAAGTGGATGAAGGCTC-3’ | 134 | 60 |
| go_GPX4b_b_rv | 5’-CACTTGGATCATCTGTGGGG-3’ | 60 |
| sq_SOD2_b_fw | 5’-CACTACAGGTCTCGTCCCAC-3’ | 116 | 60 |
| sq_SOD2_b_rv | 5’-CCCAGCTCACAACATTCCAG-3’ | 60 |
| 1_FW_GPX4_CAV_RT | 5'- AGCGGACATAAAGGAGTTTGCT-3' | 199 | 60 |
| 1_RV_GPX4_CAV_RT | 5'- CCTCTTCACGACCCGACCTT-3' | 60 |
| sq_GAPDH_b_fw | 5’-ATCACAGCCACACAGAAGAC-3’ | 126 | 60 |
| sq_GAPDH_b_rv | 5’-AGGAATGACTTTGCCCACAG-3’ | 60 |

*Table S1. Primer pairs used for qRT-PCR. Amplicon sizes and annealing temperatures (Ta) are also indicated.*
